# Supplementary material
Source: PubMed Central journal article supplement (PMC2077084)
Supplement: NIHMS33102-supplement-Supp_Fig_1.pdf [file NIHMS33102-supplement-Supp_Fig_1.pdf]

## Supplementary figure 1

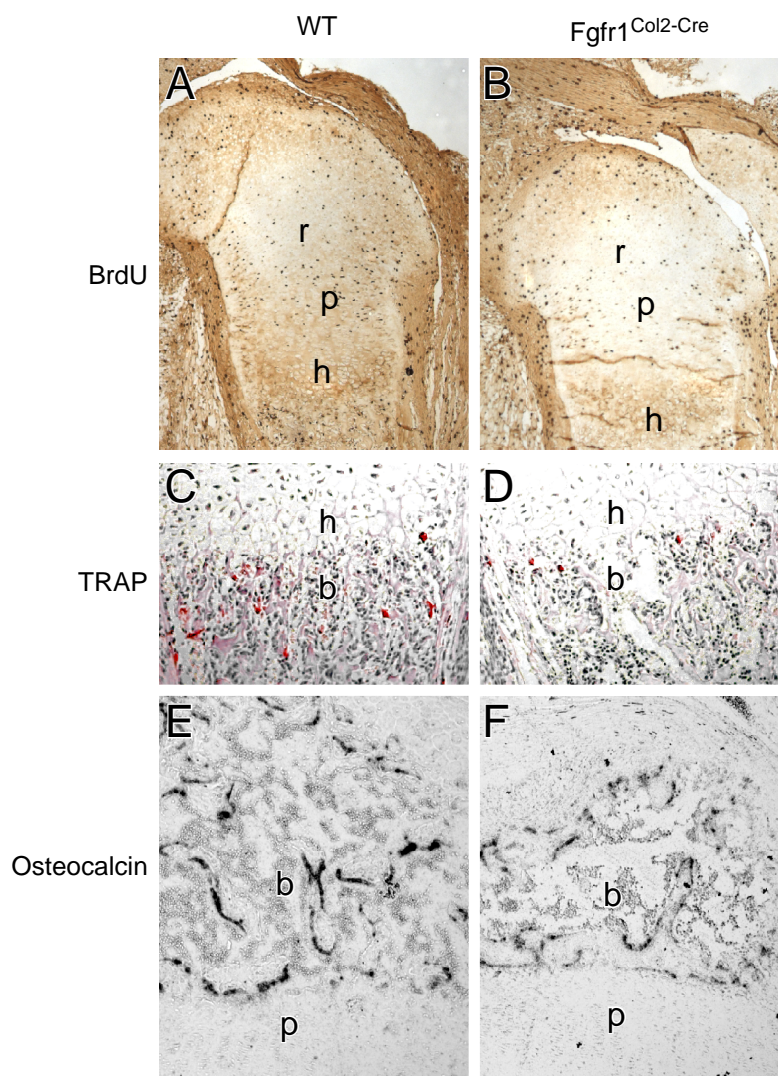

**Supplementary Figure 1.** Skeletal analysis of Fgfr1Col2-cko mice. (A, B) BrdU labeling of the distal femur at E18.5 showing no significant difference in proliferation in control (A) and Fgfr1Col2-cko (B) embryos. 10x objective. (C, D) TRAP enzymatic stain showing reduced number and size of TRAP positive cells at the chondro-osseous junction in Fgfr1Col2-cko femurs (D) compared to control (C). 20x objective. (E, F) Osteocalcin in situ hybridization showing reduced levels of expression in the secondary ossification center of P14 Fgfr1Col2-cko femurs (E) compared to control (F). 10x objective.
